# Supplementary material
Source: PubMed Central journal article supplement (PMC3285319)
Supplement: supp_M111.289801_jbc.M111.289801-1.pdf [file supp_M111.289801_jbc.M111.289801-1.pdf]

Supplementary Figure S1, related to Figure 2

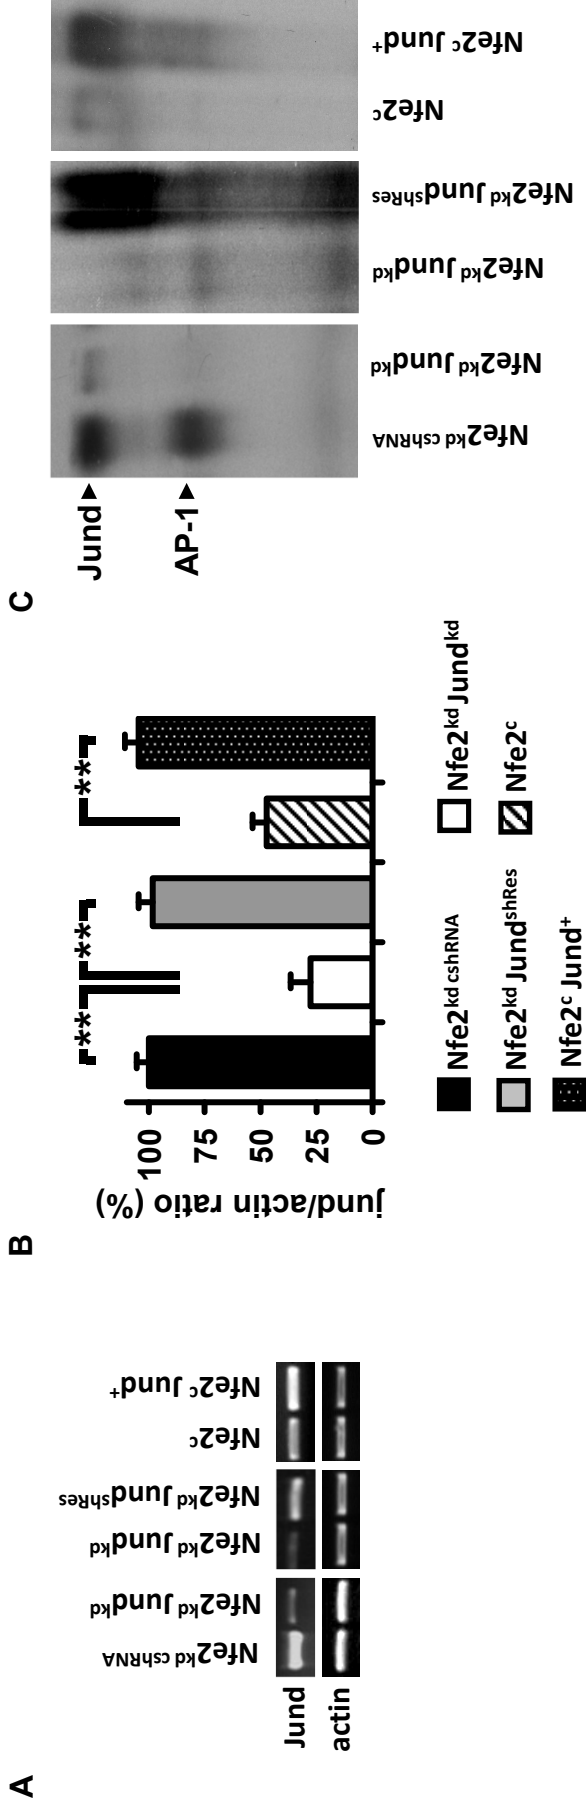

**Supplementary Figure S1: Efficiency of Jund knock down and knock in *in vitro***

Infection of Nfe2<sup>kd</sup> trophoblast cells with Jund specific shRNA expressing lentiviral particles (Nfe2<sup>kd</sup>Jund<sup>kd</sup>) reduces Jund mRNA levels (a, b) and binding activity of Jund (c) when compared to Nfe2<sup>kd</sup> cells transfected with non-specific shRNA (Nfe2<sup>kd</sup>cshRNA). Reduction of Jund expression or Jund binding activity is not observed when Nfe2<sup>kd</sup>Jund<sup>kd</sup> trophoblast cells are transiently infected with a shRNA resistant Jund mutant (Nfe2<sup>kd</sup>Jund<sup>shRes</sup>, a-c). Infection of control trophoblast cells (Nfe2<sup>c</sup>) with Jund overexpressing lentiviral particles (Nfe2<sup>c</sup> Jund<sup>+</sup>) increases Jund expression and Jund binding activity (a-c). Representative images of semiquantitative RT-PCR (a), bar graph summarizing results of RT-PCR analyses (b), and representative images of supershift EMSA for Jund (c). mean value  $\pm$  s.e.m.; \*\* $P < 0.01$  (T-test).

Supplementary Figure S2, related to Figure 3

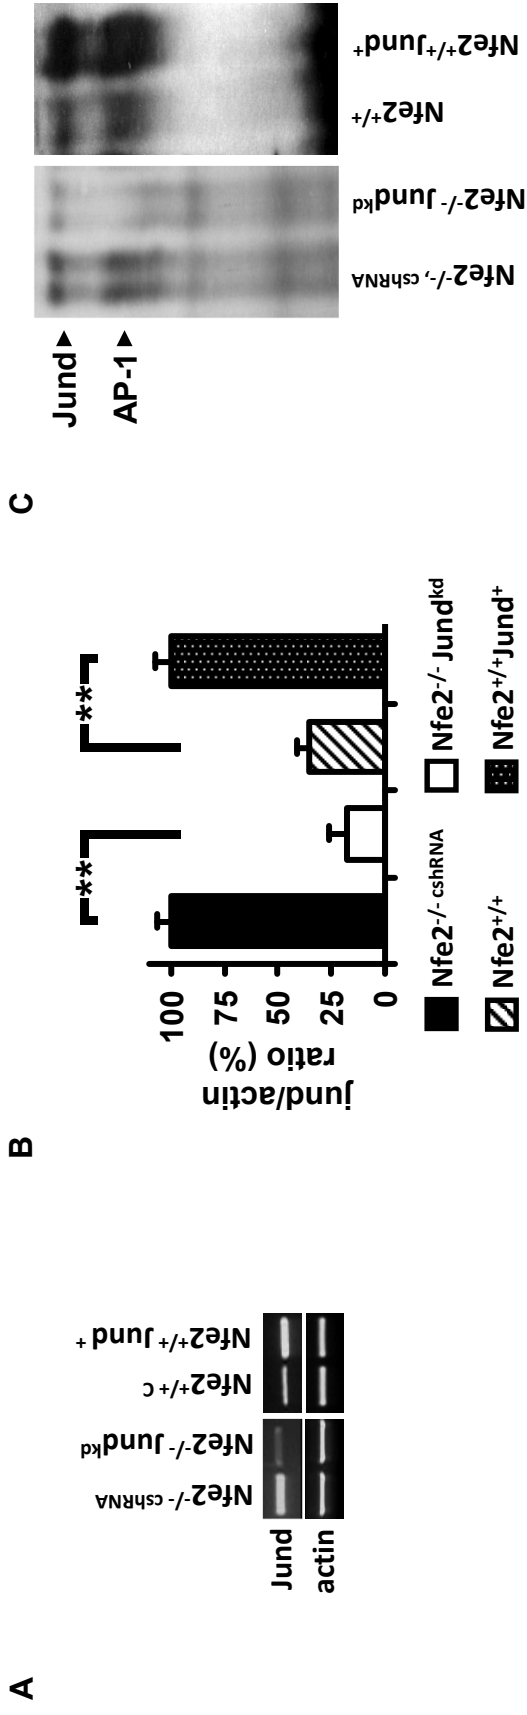

**Supplementary Figure S2: Efficiency of Jund knock down and Jund overexpression *in vivo***

Following transduction of Nfe2<sup>-/-</sup> blastocysts with Jund specific shRNA expressing lentiviral particles (Nfe2<sup>-/-</sup>Jund<sup>kd</sup>) Jund mRNA levels (a, b) and Jund binding activity (c) are reduced in placental extracts obtained at day 14.5 p.c. Conversely, overexpression of Jund using the lentiviral approach (Nfe2<sup>+/+</sup>Jund<sup>+</sup>) results in enhanced Jund mRNA levels and Jund binding activity in placental extracts obtained at day 14.5 p.c. Representative images of semiquantitative RT-PCR (a), bar graph summarizing results of RT-PCR analyses (b), and representative images of supershift EMSA for jund (c). mean value ± s.e.m.; \*\**P* < 0.01 (T-test).
